# Supplementary material
Source: PubMed Central journal article supplement (PMC2906907)
Supplement: 1000715107_pnas.201000715SI.pdf [file 1000715107_pnas.201000715SI.pdf]

# Supporting Information

Marrero et al. 10.1073/pnas.1000715107

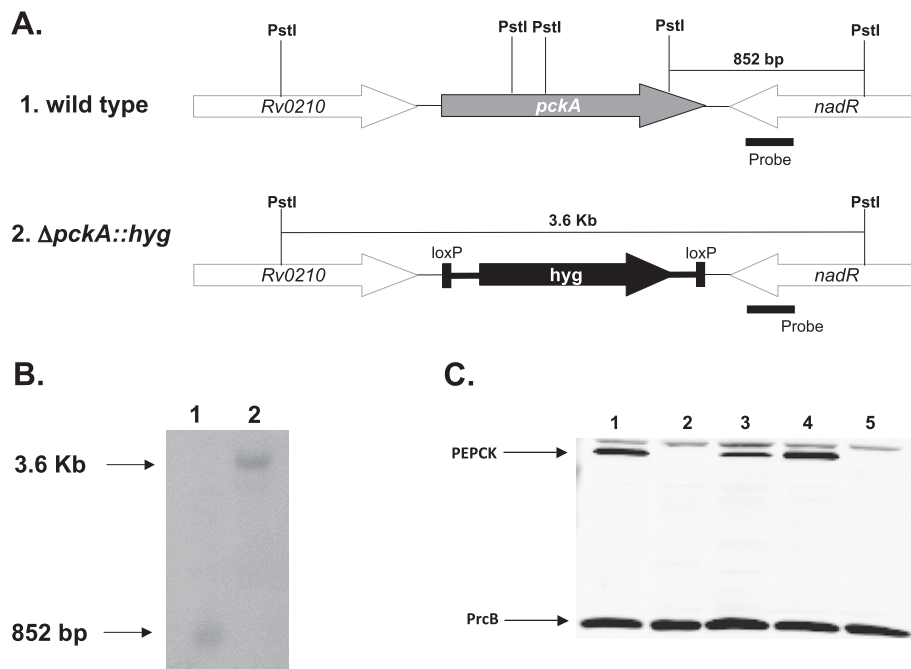

**Fig. S1.** Analysis of *pckA* knockout ( $\Delta pckA$ ) and complemented strains. (A) Genomic region of *pckA* in WT and  $\Delta pckA$ . Location of PstI sites and hybridization site of probe used for Southern blot are depicted. (B) Southern blot of PstI digested chromosomal DNA from WT and  $\Delta pckA$  probed with the DNA fragment indicated in A. Southern blot analysis was performed using ECL Direct Nucleic Acid Labeling and Detection System (GE Healthcare), following the manufacturer's directions, except for the detection reagent, which was TMB Substrate Reagent Set (BD OptEIA). (C) Immunoblot of *Mtb* cell lysates from WT (lane 1),  $\Delta pckA$  (lane 2), complemented mutant (lane 3), *pckA*-TetON grown with atc (lane 4), *pckA*-TetON grown without atc (lane 5). PEPCK (60 kDa), and PrcB (29 kDa) proteins were detected using anti-PEPCK rabbit serum and anti-PrcB rabbit serum (1). PrcB served as loading control. Immunoblots were developed using the Odyssey Infrared Imaging System (LI-COR Biosciences).

1. Gandotra S, Schnappinger D, Monteleone M, Hillen W, Ehrst S (2007) *In vivo* gene silencing identifies the *Mycobacterium tuberculosis* proteasome as essential for the bacteria to persist in mice. *Nat Med* 13:1515–1520.

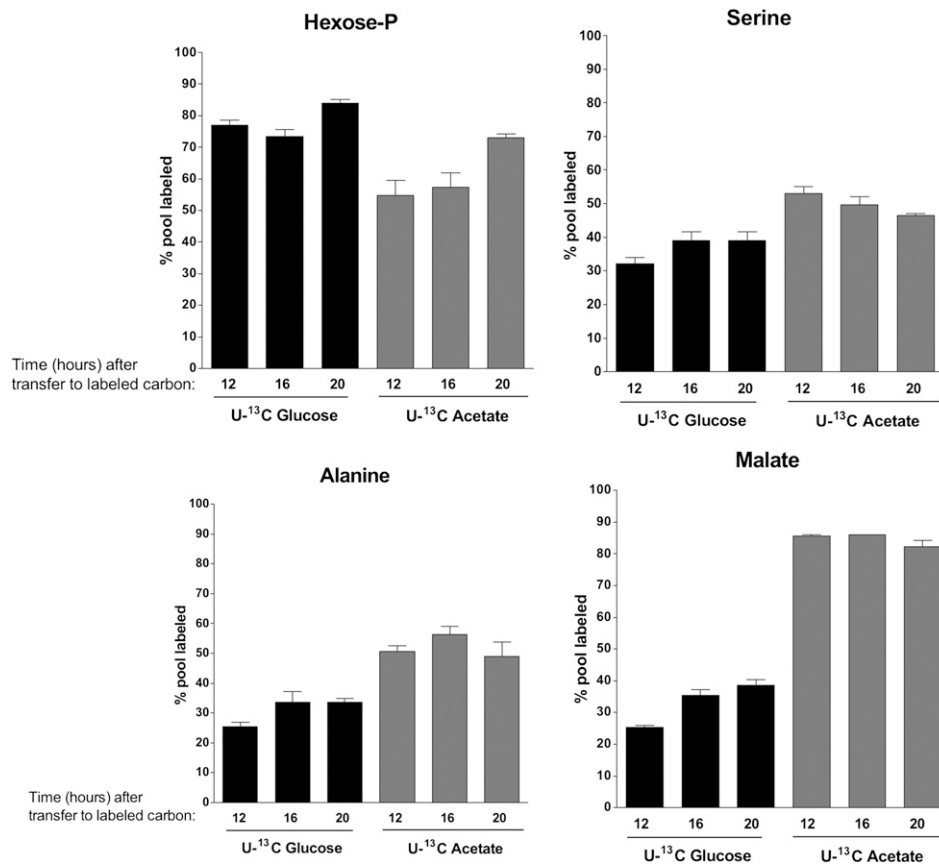

**Fig. S2.** Kinetics of  $^{13}\text{C}$  incorporation into intracellular metabolite pools. *Mtb* was seeded on 0.22- $\mu\text{M}$  nitrocellulose filters and grown on 7H10 agar plates containing 10% OADC supplement and 0.5% glycerol for 5 days. Filters were then transferred to 7H10 plates containing 0.5% BSA, 0.085% NaCl, and 0.2%  $\text{U-}^{13}\text{C}$  acetate or 0.2%  $\text{U-}^{13}\text{C}$  glucose. Incorporation of  $\text{U-}^{13}\text{C}$  acetate or  $\text{U-}^{13}\text{C}$  glucose-derived  $^{13}\text{C}$  into the intracellular pool of selected metabolites after 12, 16, or 20 h incubation is shown. Each bar represents the mean of three sample replicates; error bars indicate SD.





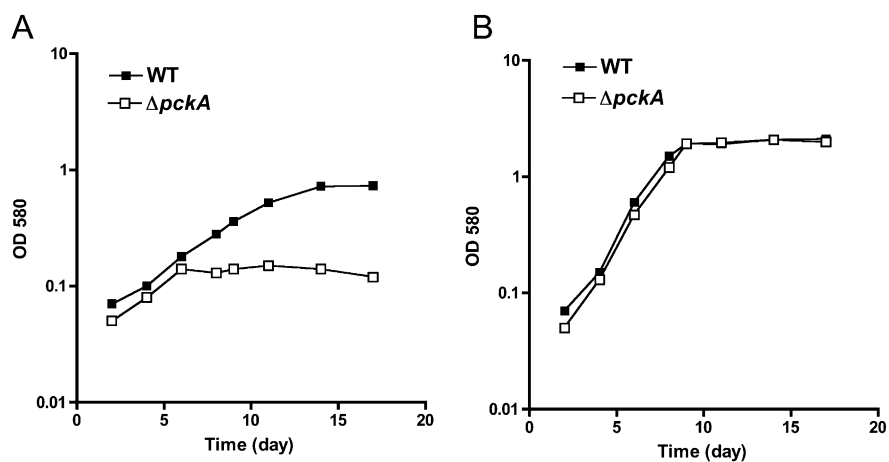

**Fig. S5.** Propionate does not inhibit growth of  $\Delta pckA$  in the presence of glycerol. Growth of WT (■) and  $\Delta pckA$  (□) in carbon-defined media containing (A) 0.1% propionate or (B) 0.1% propionate and 0.1% glycerol.

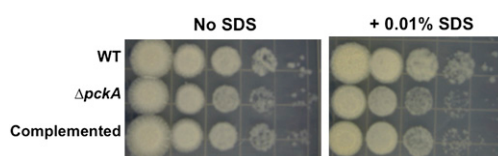

**Fig. S6.**  $\Delta pckA$  is not significantly more sensitive than WT to detergent. Serial dilutions of WT,  $\Delta pckA$ , and the complemented mutant were spotted on 7H10 plates containing either no SDS or 0.01% SDS. Plates were incubated at 37 °C for 2 weeks.

**Table S1. LC-MS masses, natural abundance, and retention time measurements of metabolites detected in unlabeled *Mtb* cell lysate**

|            | Metabolite | Calculated <i>m/z</i> | Observed <i>m/z</i> | Natural abundance M+1(%) | Retention time (min) |
|------------|------------|-----------------------|---------------------|--------------------------|----------------------|
| [M-H] ions | Hexose-P   | 259.0224              | 259.0238            | 7.9                      | 3.6                  |
|            | PEP        | 166.9751              | 166.9765            | 0.1                      | 2.2                  |
|            | Pyruvate   | 87.0088               | 87.0098             | 2.9                      | 1.0                  |
|            | Malate     | 133.0142              | 133.0150            | 4.1                      | 1.8                  |
| [M+H] ions | Serine     | 106.0499              | 106.0502            | 4.0                      | 9.4                  |
|            | Alanine    | 90.0550               | 90.0560             | 3.8                      | 10.5                 |
|            | Aspartate  | 134.0448              | 134.0450            | 6.6                      | 7.8                  |
